# Supplementary material for: Triheptanoin dramatically reduces paroxysmal motor disorder in patients with GLUT1 deficiency
Source: PubMed Central journal article supplement — J Neurol Neurosurg Psychiatry. 2015 Nov 4;87(5):550–3. doi: 10.1136/jnnp-2015-311475 (PMC4853553; doi:10.1136/jnnp-2015-311475), 2015-11-04
Supplement: jnnp-2015-311475-s1.pdf [file jnnp-2015-311475-s1.pdf]

## SUPPLEMENTARY DATA

**Table e1:** Example of patient diary.

|                         |                                                                                            | Type of symptoms | Duration of symptoms (min) | Severity of symptoms |
|-------------------------|--------------------------------------------------------------------------------------------|------------------|----------------------------|----------------------|
| <b>Motor events</b>     | Convulsion*                                                                                |                  |                            |                      |
|                         | Seizure*                                                                                   |                  |                            |                      |
|                         | Stiffness                                                                                  |                  |                            |                      |
|                         | Abnormal movement                                                                          | X                | 5                          | 2                    |
|                         | Tremor                                                                                     |                  |                            |                      |
|                         | Speech disorder                                                                            |                  |                            |                      |
|                         | Abnormal eye movements                                                                     |                  |                            |                      |
|                         | Partial/total weakness of a limb                                                           |                  |                            |                      |
| <b>Non-motor events</b> | Fatigue                                                                                    |                  |                            |                      |
|                         | Disorientation                                                                             |                  |                            |                      |
|                         | Headaches                                                                                  |                  |                            |                      |
|                         | Sleep disorder                                                                             |                  |                            |                      |
|                         | Mood switch                                                                                |                  |                            |                      |
|                         | Other                                                                                      |                  |                            |                      |
| <b>Severity code</b>    |                                                                                            |                  |                            |                      |
| <b>1</b>                | No change in daily activity; no need for medication or medical intervention                |                  |                            |                      |
| <b>2</b>                | Partial change in daily activity while medication or medical intervention is not mandatory |                  |                            |                      |
| <b>3</b>                | Change in daily activity with medication or medical intervention needed                    |                  |                            |                      |

\* No patient reported convulsions/seizures during the course of this study.

**SUPPLEMENTARY DATA**

**Table e2:** Main characteristics of patients with GLUT1 deficiency and detailed response to treatment.

|                                       |              | <b>Patients</b>                      |                                       |                                                      |                                        |                                          |                             |    |
|---------------------------------------|--------------|--------------------------------------|---------------------------------------|------------------------------------------------------|----------------------------------------|------------------------------------------|-----------------------------|----|
|                                       |              | <b>P1</b>                            | <b>P2</b>                             | <b>P3</b>                                            | <b>P4</b>                              | <b>P5</b>                                | <b>P6</b>                   |    |
| <b>Gender</b>                         |              | F                                    | F                                     | M                                                    | M                                      | M                                        | M                           |    |
| <b>Age</b>                            |              | 23                                   | 20                                    | 7                                                    | 14                                     | 16                                       | 47                          |    |
| <b>Age of onset</b>                   |              | 1.5                                  | 1.5                                   | 2                                                    | 3.5                                    | 2.5                                      | 14                          |    |
| <b>CSF/plasma glucose</b>             |              | 0.50                                 | 0.40                                  | 0.44                                                 | -                                      | 0.42                                     | -                           |    |
| <b>SLC2A1 mutation</b>                |              | c.880T>C                             | c.425T>A                              | c.940G>A                                             | c.34C>T                                | c.34C>T                                  | c.34C>T                     |    |
|                                       |              | p. Ser294Pro                         | p. Met142Lys                          | p. Gly314Ser                                         | p. Leu12Phe                            | p. Leu12Phe                              | p. Leu12Phe                 |    |
| <b>Main permanent manifestations</b>  |              | Cerebellar ataxia; attention deficit | Mental retardation; cerebellar ataxia | Learning disability; mild ataxia; pyramidal syndrome | Segmental dystonia; pyramidal syndrome | Generalized dystonia; pyramidal syndrome | Pyramidal syndrome          |    |
| <b>Main paroxysmal manifestations</b> |              | Dystonia; headache                   | Dyskinesia                            | Dyskinesia; ocular movement; headache                | Fatigue; headache                      | Dyskinesia; fatigue; headache            | Dystonia; fatigue; headache |    |
| <b>Baseline</b>                       | <b>Motor</b> | Hyperkinetic movement disorders      | 3                                     | 14                                                   | 4                                      | 0                                        | 12                          | 54 |
|                                       |              | Other <sup>a</sup>                   | 3                                     | 2                                                    | 6                                      | 1                                        | 0                           | 0  |

<sup>a</sup> speech disorder, partial/total weakness of a limb, abnormal eye movement; <sup>b</sup> disorientation, headache, mood switch.

**SUPPLEMENTARY DATA**

**Table e2:** continued

|                   |                  |                                 | <b>Patients</b> |           |           |           |           |           |
|-------------------|------------------|---------------------------------|-----------------|-----------|-----------|-----------|-----------|-----------|
|                   |                  |                                 | <b>P1</b>       | <b>P2</b> | <b>P3</b> | <b>P4</b> | <b>P5</b> | <b>P6</b> |
| <b>Baseline</b>   | <b>Non motor</b> | Fatigue                         | 1               | 1         | 2         | 6         | 16        | 2         |
|                   |                  | Headache                        | 1               | 1         | 0         | 7         | 3         | 2         |
|                   |                  | Other <sup>b</sup>              | 2               | 2         | 1         | 12        | 0         | 27        |
|                   | <i>Total</i>     |                                 | <i>10</i>       | <i>20</i> | <i>13</i> | <i>26</i> | <i>31</i> | <i>85</i> |
| <b>Treatment</b>  | <b>Motor</b>     | Hyperkinetic movement disorders | 2               | 7         | 0         | 0         | 1         | 0         |
|                   |                  | Other <sup>a</sup>              | 0               | 0         | 3         | 0         | 0         | 0         |
|                   |                  | <i>Total</i>                    |                 | <i>2</i>  | <i>7</i>  | <i>3</i>  | <i>0</i>  | <i>1</i>  |
|                   | <b>Non motor</b> | Fatigue                         | 0               | 0         | 0         | 0         | 0         | 0         |
|                   |                  | Headache                        | 0               | 0         | 2         | 0         | 0         | 0         |
|                   |                  | Other <sup>b</sup>              | 2               | 0         | 0         | 0         | 0         | 0         |
| <i>Total</i>      |                  | <i>2</i>                        | <i>0</i>        | <i>2</i>  | <i>0</i>  | <i>0</i>  | <i>0</i>  |           |
| <b>Withdrawal</b> | <b>Motor</b>     | Hyperkinetic movement disorders | 9               | 9         | 1         | 1         | 15        | 39        |
|                   |                  | Other <sup>a</sup>              | 0               | 0         | 0         | 0         | 0         | 1         |
|                   |                  | <i>Total</i>                    |                 | <i>9</i>  | <i>9</i>  | <i>1</i>  | <i>1</i>  | <i>15</i> |
|                   | <b>Non motor</b> | Fatigue                         | 0               | 1         | 3         | 4         | 16        | 8         |
|                   |                  | Headache                        | 1               | 0         | 1         | 15        | 5         | 7         |
|                   |                  | Other <sup>b</sup>              | 0               | 1         | 0         | 0         | 0         | 8         |
| <i>Total</i>      |                  | <i>1</i>                        | <i>1</i>        | <i>4</i>  | <i>19</i> | <i>21</i> | <i>15</i> |           |
| <i>Total</i>      |                  | <i>10</i>                       | <i>11</i>       | <i>5</i>  | <i>20</i> | <i>36</i> | <i>63</i> |           |

<sup>a</sup> speech disorder, partial/total weakness of a limb, abnormal eye movement; <sup>b</sup> disorientation, headache, mood switch.
